# Supplementary material for: Novel sustainable synthesis of a formaldehyde-free thermosetting phenolic resin through solvent-free reactive extrusion
Source: Royal Society of Chemistry journal article supplement (doi:10.1039/d4gc05352d), 2025-01-01
Supplement: d4gc05352d1.pdf [file d4gc05352d1.pdf]

## **Novel sustainable synthesis of resorcinol-terephthalaldehyde thermosetting phenolic resin through solvent-free reactive extrusion**

Alex Maokhamphiou<sup>a,b</sup>, Matthieu Zinet<sup>a</sup>, William Guerin<sup>b</sup>, Arnaud Soisson<sup>b</sup>, Morgane Petit<sup>b</sup>, Guillaume Jobard<sup>a</sup>, Fernande da Cruz-Boisson<sup>a</sup>, Karim Delage<sup>a</sup>, Romain Tavernier<sup>a</sup>, Véronique Bounor-Legaré<sup>a</sup>

*<sup>a</sup>Université Claude Bernard Lyon 1, INSA Lyon, Université Jean Monnet, CNRS UMR 5223, Ingénierie des Matériaux Polymères F-69621 Villeurbanne Cédex, France*

*<sup>b</sup>Saint-Gobain Research Paris, département Produits Composites et Revêtements de Surface, groupe Liants Polymères, 39 Quai Lucien Lefranc 93300 Aubervilliers, France*

## **Supporting Information**

## Table des matières

|                                                                                    |    |
|------------------------------------------------------------------------------------|----|
| 1. Sustainable synthesis routes for bio-based monomers.....                        | 3  |
| 2. Structural characterization of the resin synthesized by reactive extrusion..... | 4  |
| a. 2D $^1\text{H}/^{13}\text{C}$ HSQC NMR spectrum .....                           | 4  |
| b. $^{13}\text{C}$ -NMR and DEPT135 NMR spectra.....                               | 5  |
| c. 2D $^1\text{H}/^{13}\text{C}$ HMBC NMR spectrum .....                           | 5  |
| d. Flash chromatography.....                                                       | 6  |
| e. Mass spectrometry.....                                                          | 7  |
| 3. Thermal analyses of the resin synthesized by reactive extrusion (TGA-IR) .....  | 8  |
| a. TGA of TPA.....                                                                 | 8  |
| b. Absorption spectra of TPA.....                                                  | 8  |
| c. Absorption spectra of the resin synthesized by reactive extrusion .....         | 9  |
| d. TGA of the resin synthesized by reactive extrusion .....                        | 10 |

## 1. Sustainable synthesis routes for bio-based monomers

TPA can be produced from oxidation of bio-sourced para-xylene (which is used in large-scale production of bio-based PET). **Figure S1** shows a pathway for obtaining bio-based para-xylene for the production bio-terephthalic acid.<sup>1</sup>

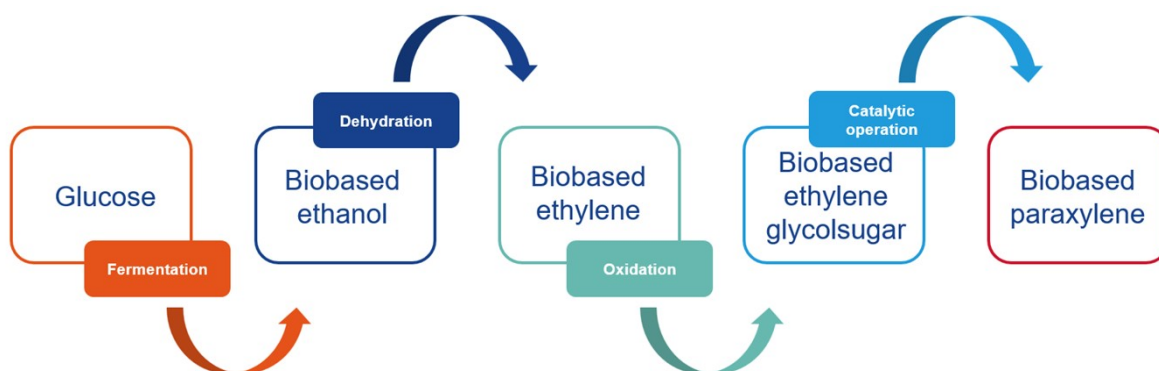

*Figure S1 : General scheme for biobased paraxylene for bio-PET production*

Other sustainable pathways for p-xylene production include cycloaddition of biomass-derived furans, direct conversion of lignocellulose via catalytic fast pyrolysis or synthesis from isobutanol.<sup>2</sup>

Resorcinol is a promising monomer as it can be produced from the biomass following different pathways. In fact, resorcinol can be synthesized from catechin or glucose by fermentation.<sup>3</sup> Glucose is first converted into inositol via fermentation, which is then chemically transformed into 1,3,5-benzenetriol (phloroglucinol). This intermediate can subsequently be reduced to resorcinol (**Figure S2**).

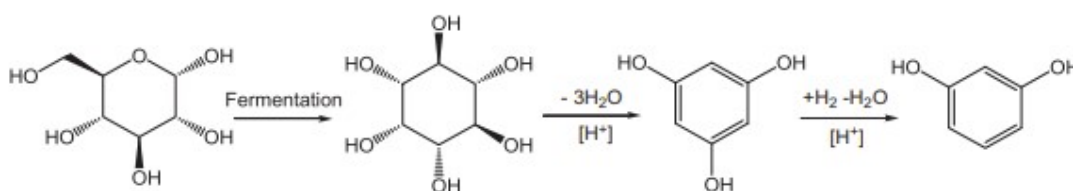

*Figure S2 : Resorcinol synthesis from glucose via inositol*

Glucose can also undergo fermentation to produce triacetic acid lactone. This compound is further converted to 1,3,5-benzenetriol methyl ether, which can be reduced to resorcinol either directly or via intermediate steps. (**Figure S3**)

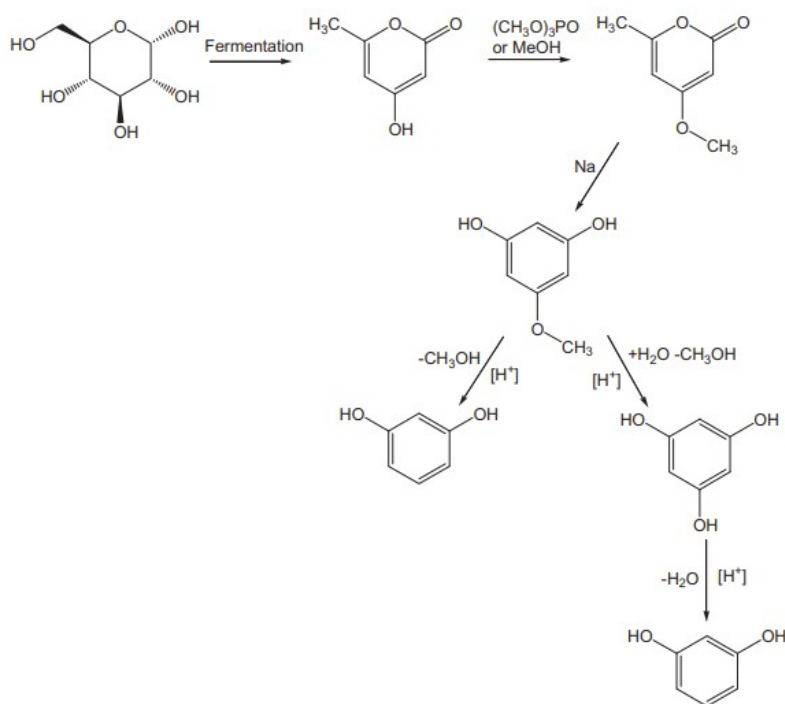

Figure S3 : Resorcinol synthesis from glucose via triacetic acid lactone

## 2. Structural characterization of the resin synthesized by reactive extrusion

### a. 2D $^1\text{H}/^{13}\text{C}$ HSQC NMR spectrum

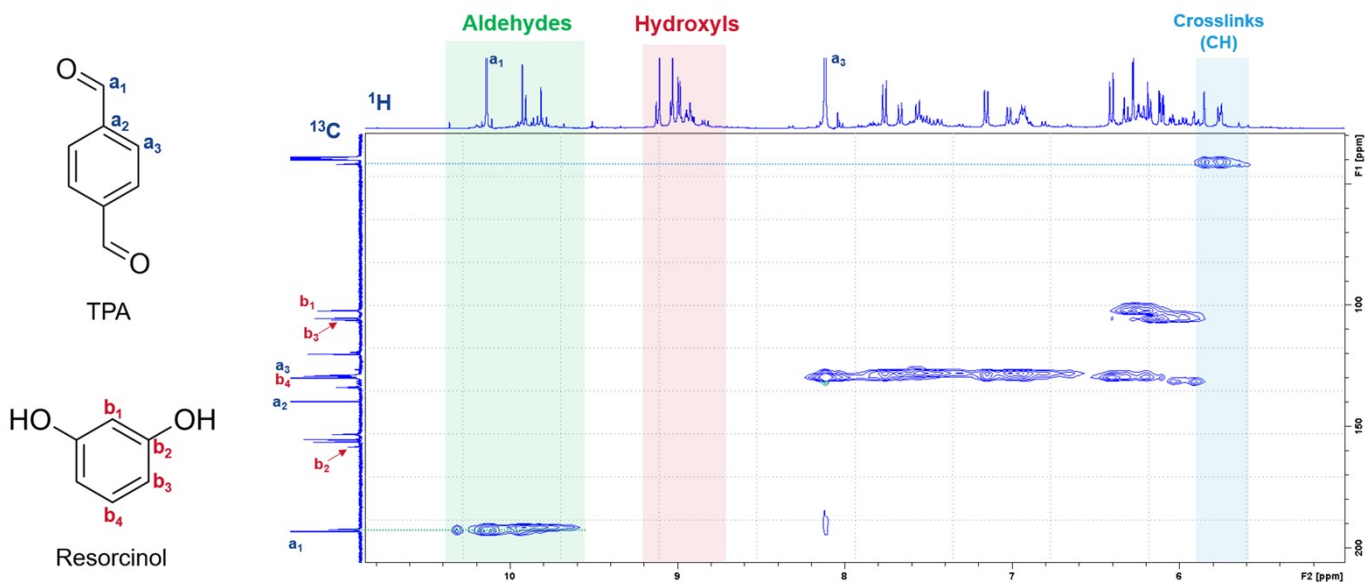

Figure S4 : 2D  $^1\text{H}/^{13}\text{C}$  HSQC NMR spectrum in  $\text{DMSO-d}_6$  (298K) of the resin for a TPA-to-resorcinol molar ratio of 1.6. The extrusion temperature was set to 150 °C with a flow rate of 1  $\text{kg}\cdot\text{h}^{-1}$  and a screw speed of 100 rpm (RT1.6\_T150[3'10]). The signal attributions of the residual monomers is shown on the spectra.

b.  $^{13}\text{C}$ -NMR and DEPT135 NMR spectra

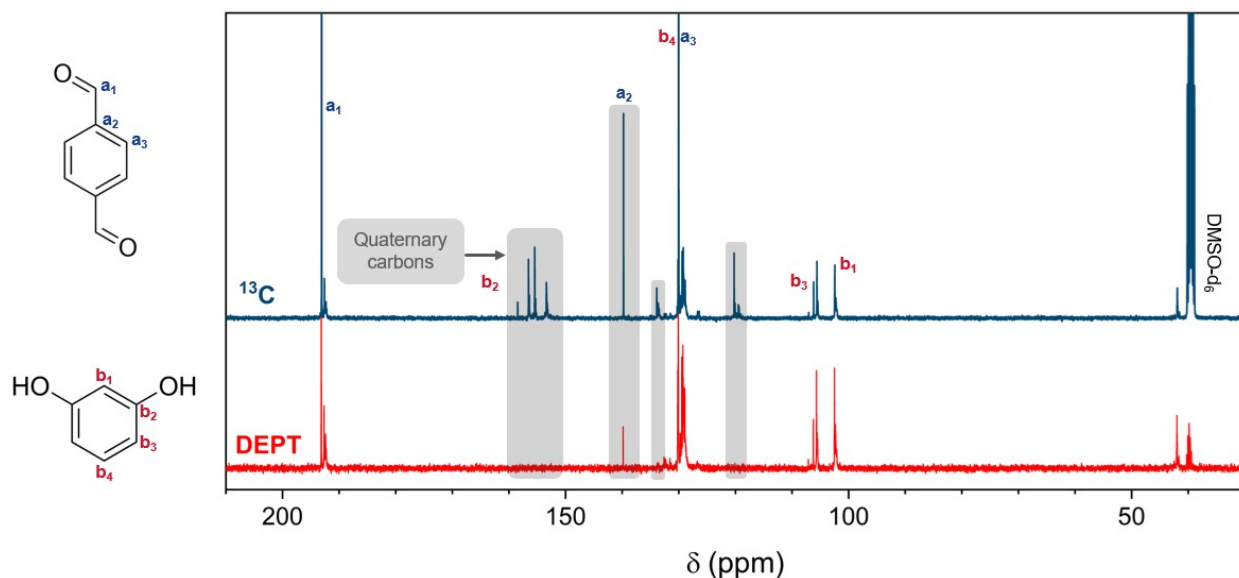

Figure S5:  $^{13}\text{C}$ -NMR and DEPT135 NMR spectra in DMSO- $d_6$  (298K) of the resin for a TPA-to-resorcinol molar ratio of 1.6. The extrusion temperature was set to 150 °C with a flow rate of 1 kg·h $^{-1}$  and a screw speed of 100 rpm (RT1.6\_T150[3'10]). The signal attributions of the residual monomers are shown on the spectra. The  $a_2$  signal corresponds to a quaternary carbon but has not been but fully suppressed on the DEPT 135 NMR spectrum.

c. 2D  $^1\text{H}/^{13}\text{C}$  HMBC NMR spectrum

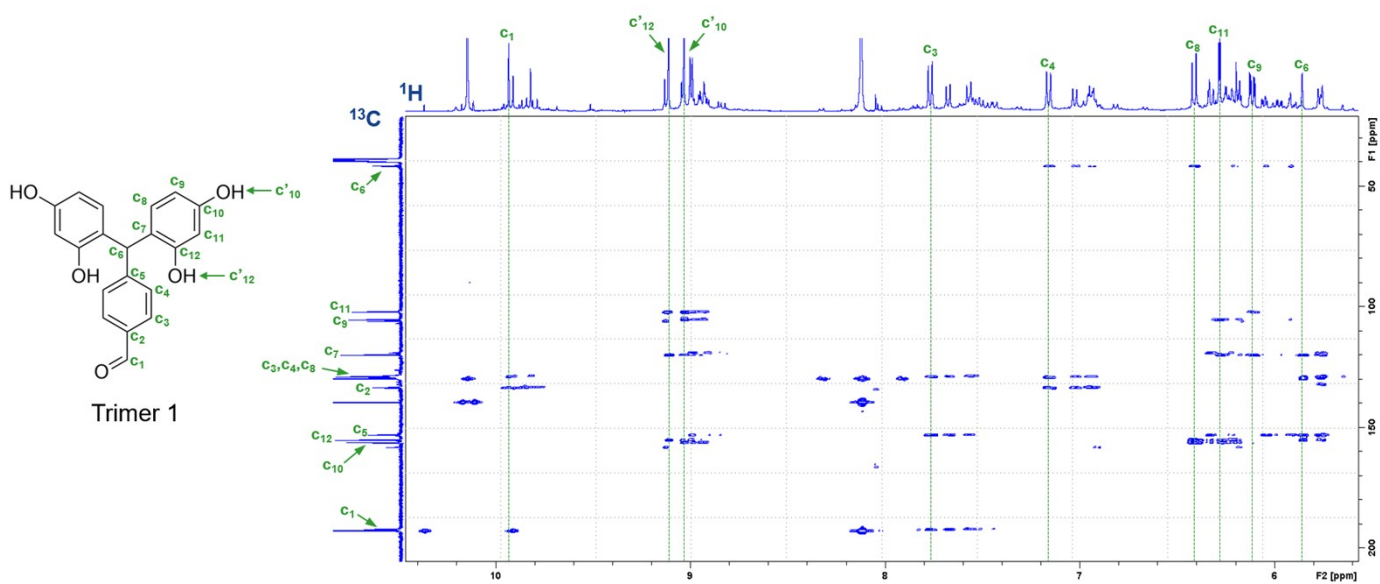

Figure S6: 2D  $^1\text{H}/^{13}\text{C}$  HMBC NMR spectrum in DMSO- $d_6$  (298K) of the resin for a TPA-to-resorcinol molar ratio of 1.6. The extrusion temperature was set to 150 °C with a flow rate of 1 kg·h $^{-1}$  and a screw speed of 100 rpm (RT1.6\_T150[3'10]). The signal attributions of the trimer 1 synthesized is shown on the spectra.

#### d. Flash chromatography

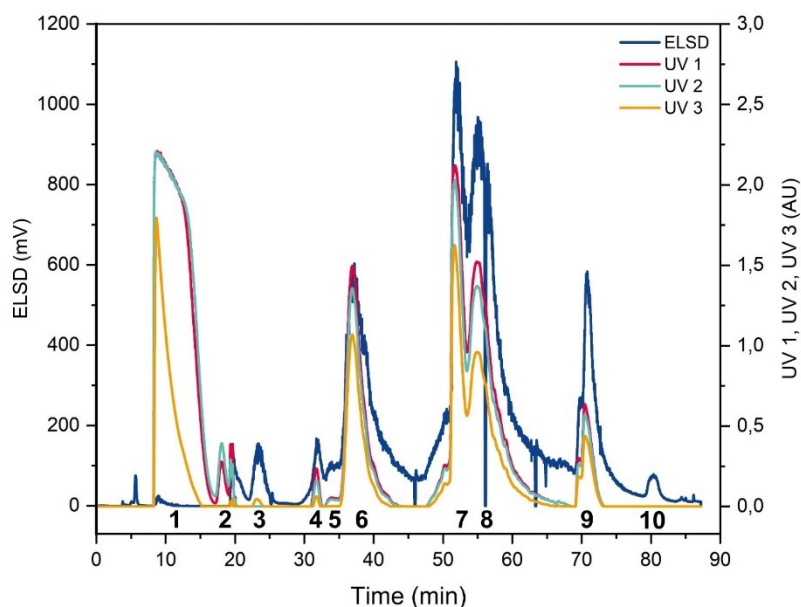

Figure S7: Chromatogram obtained from the flash chromatography of the resin for a TPA-to-resorcinol molar ratio of 1.6. The extrusion temperature was set to 150 °C with a flow rate of 1 kg·h<sup>-1</sup> and a screw speed of 100 rpm (RT1.6\_T150[3'10]). The oligomers were separated with a gradient program of solvent A (dichloromethane) and solvent B (methanol). Initially, the separation started with a low percentage of solvent B (95% A, 5% B), which was gradually increased to reach 100% of solvent B as eluent.

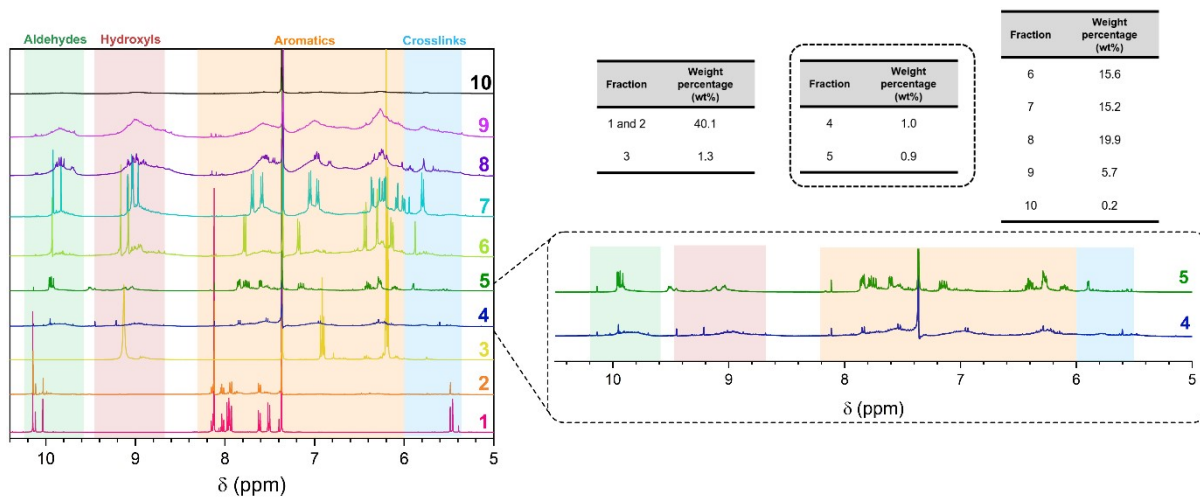

Figure S8: <sup>1</sup>H NMR spectra of the different fractions obtained from the separation by flash chromatography with a magnification on fractions 4 and 5. The weight percentage of each fraction is summarized in the tables.

e. Mass spectrometry

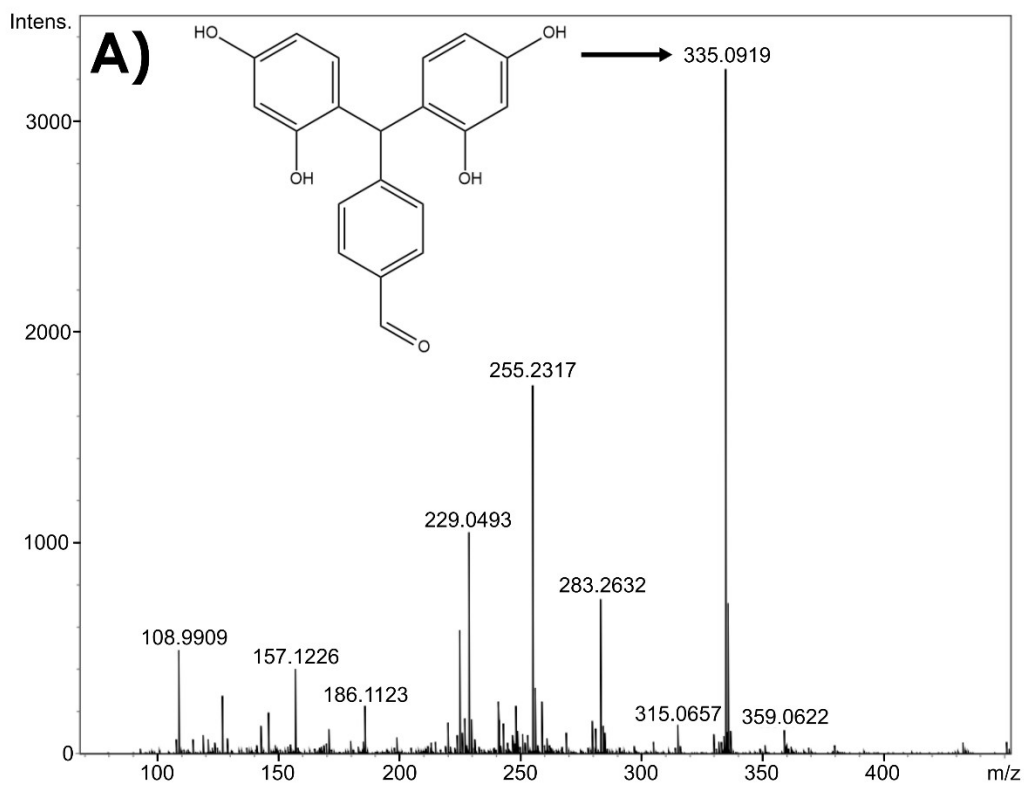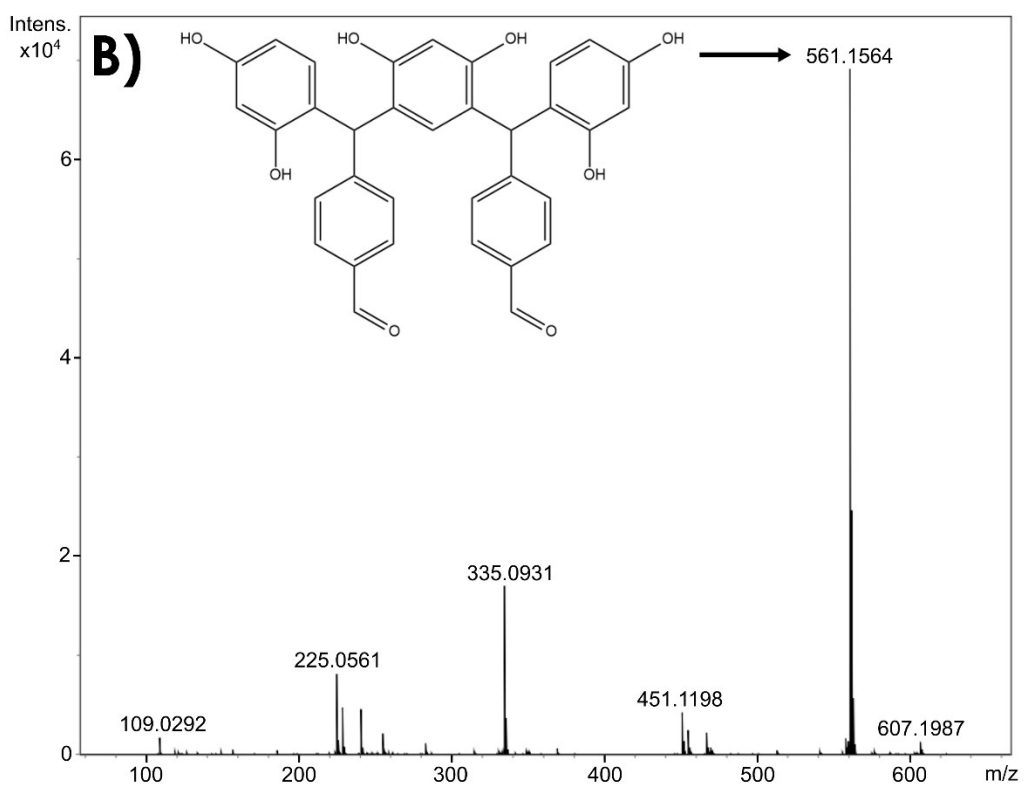

Figure S9: APCI mass spectra of two fractions in negative mode. A) Fraction 6; B) Fraction 7.

### 3. Thermal analyses of the resin synthesized by reactive extrusion (TGA-IR)

#### a. TGA of TPA

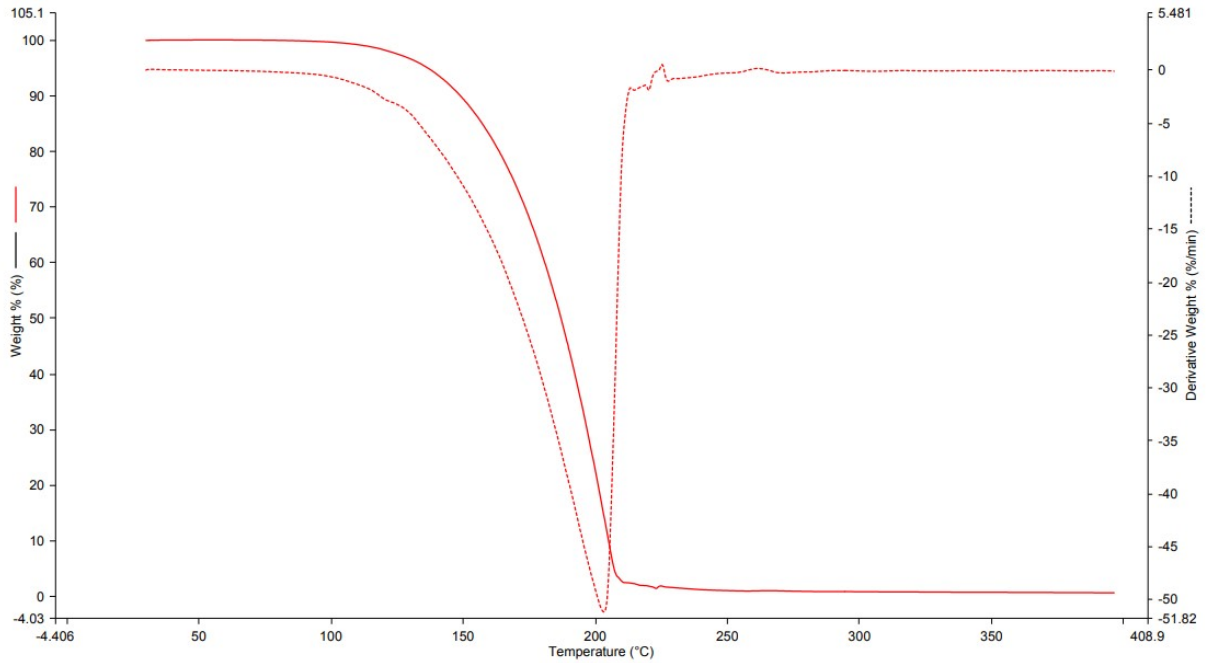

Figure S10: Thermogravimetric analysis of TPA at  $10\text{ }^{\circ}\text{C}\cdot\text{min}^{-1}$  under inert atmosphere.

#### b. Absorption spectra of TPA

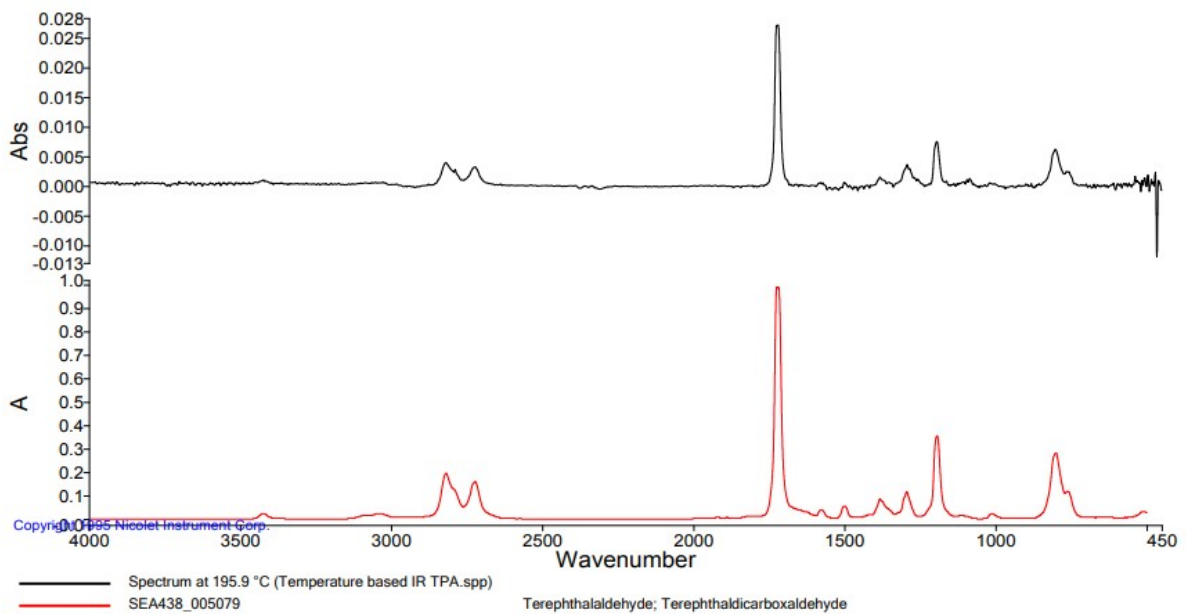

Figure S11 : Absorption spectra of the TPA obtained with the TGA-IR analysis at 196 °C (black) vs. the absorption spectra of TPA from the database (red)



c. Absorption spectra of the resin synthesized by reactive extrusion

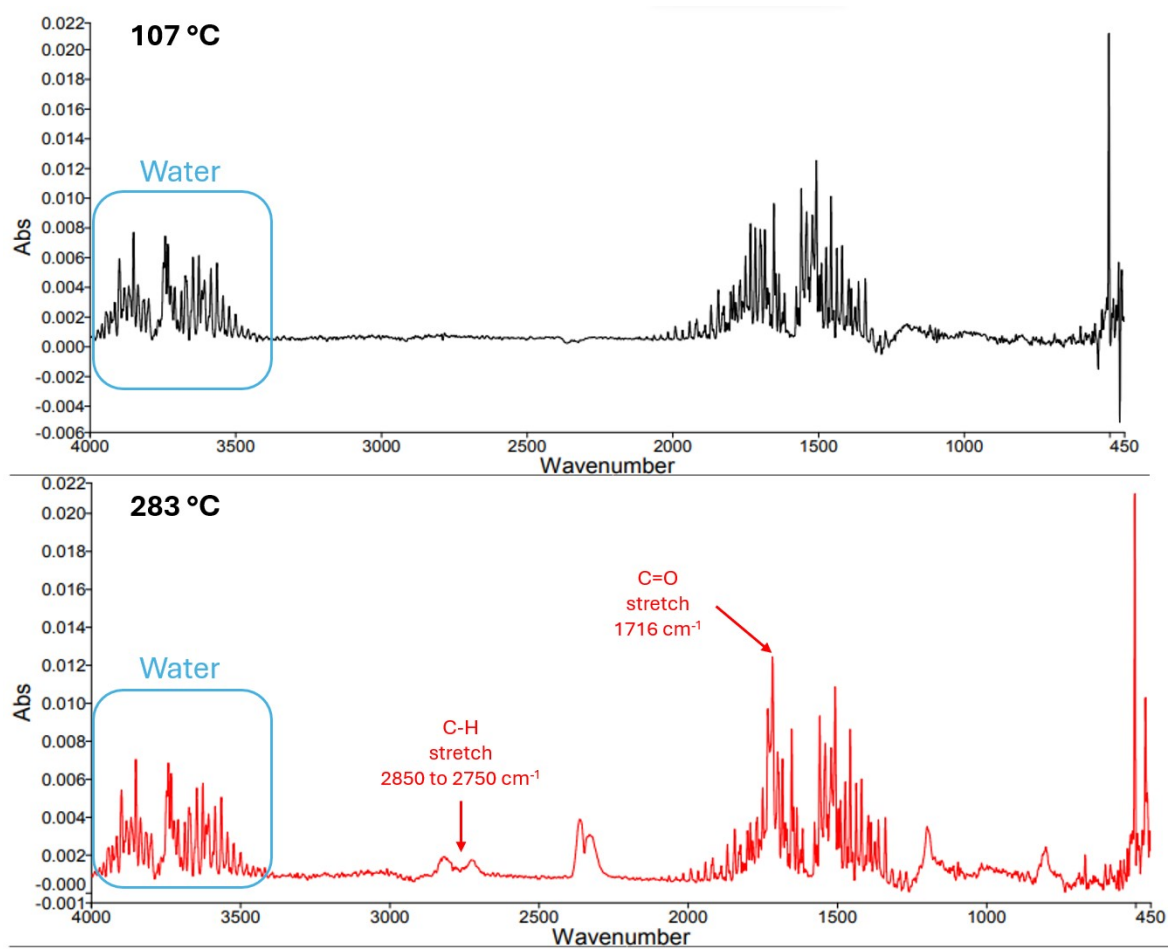

Figure S12 : Absorption spectra from TGA-IR analyses of the resin of molar ratio 1.6 at 107 °C (black) and at 283 °C (red).

d. TGA of the resin synthesized by reactive extrusion

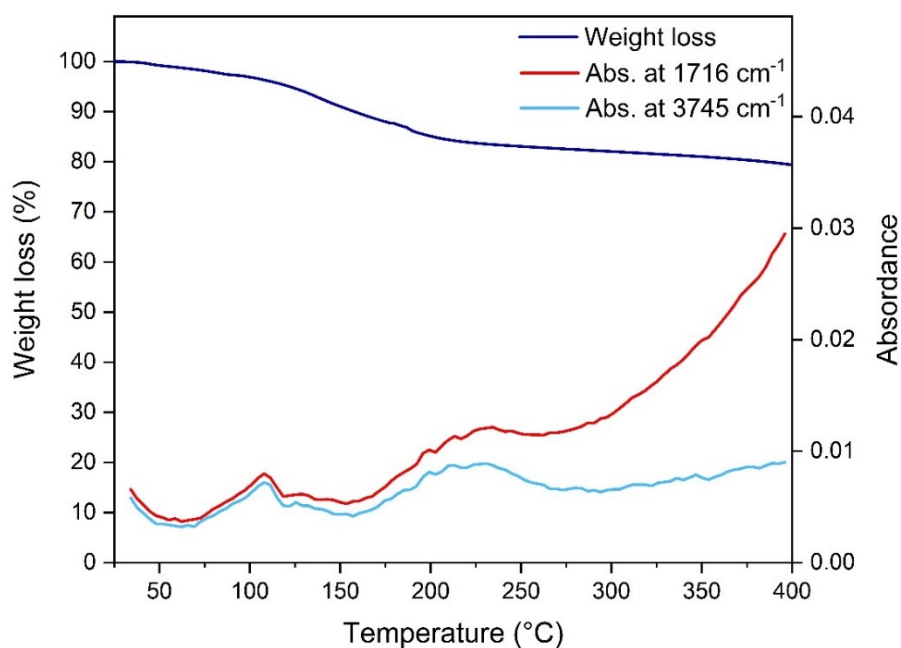

Figure S13 : TGA thermogram of the resin of molar ratio 1.6 correlated with the absorbance profiles at 1716  $\text{cm}^{-1}$  (TPA) and 3745  $\text{cm}^{-1}$  (water).

## References

- 1 V. Siracusa and I. Blanco, *Polymers*, 2020, **12**, 1641.
- 2 A. Maneffa, P. Priecel and J. A. Lopez-Sanchez, *ChemSusChem*, 2016, **9**, 2736–2748.
- 3 C. Gioia, M. B. Banella, M. Vannini, A. Celli, M. Colonna and D. Caretti, *Eur. Polym. J.*, 2015, **73**, 38–49.
